# Supplementary material
Source: PubMed Central journal article supplement (PMC7039343)
Supplement: NIHMS1054915-supplement-1.pdf [file NIHMS1054915-supplement-1.pdf]

## **SUPPLEMENTAL MATERIAL**

**Appendix Figure 1.** Readmission-free survival rates stratified into three groups by the duration between LVAD implantation and ramp test (within three months, three months to one year, and over one year)

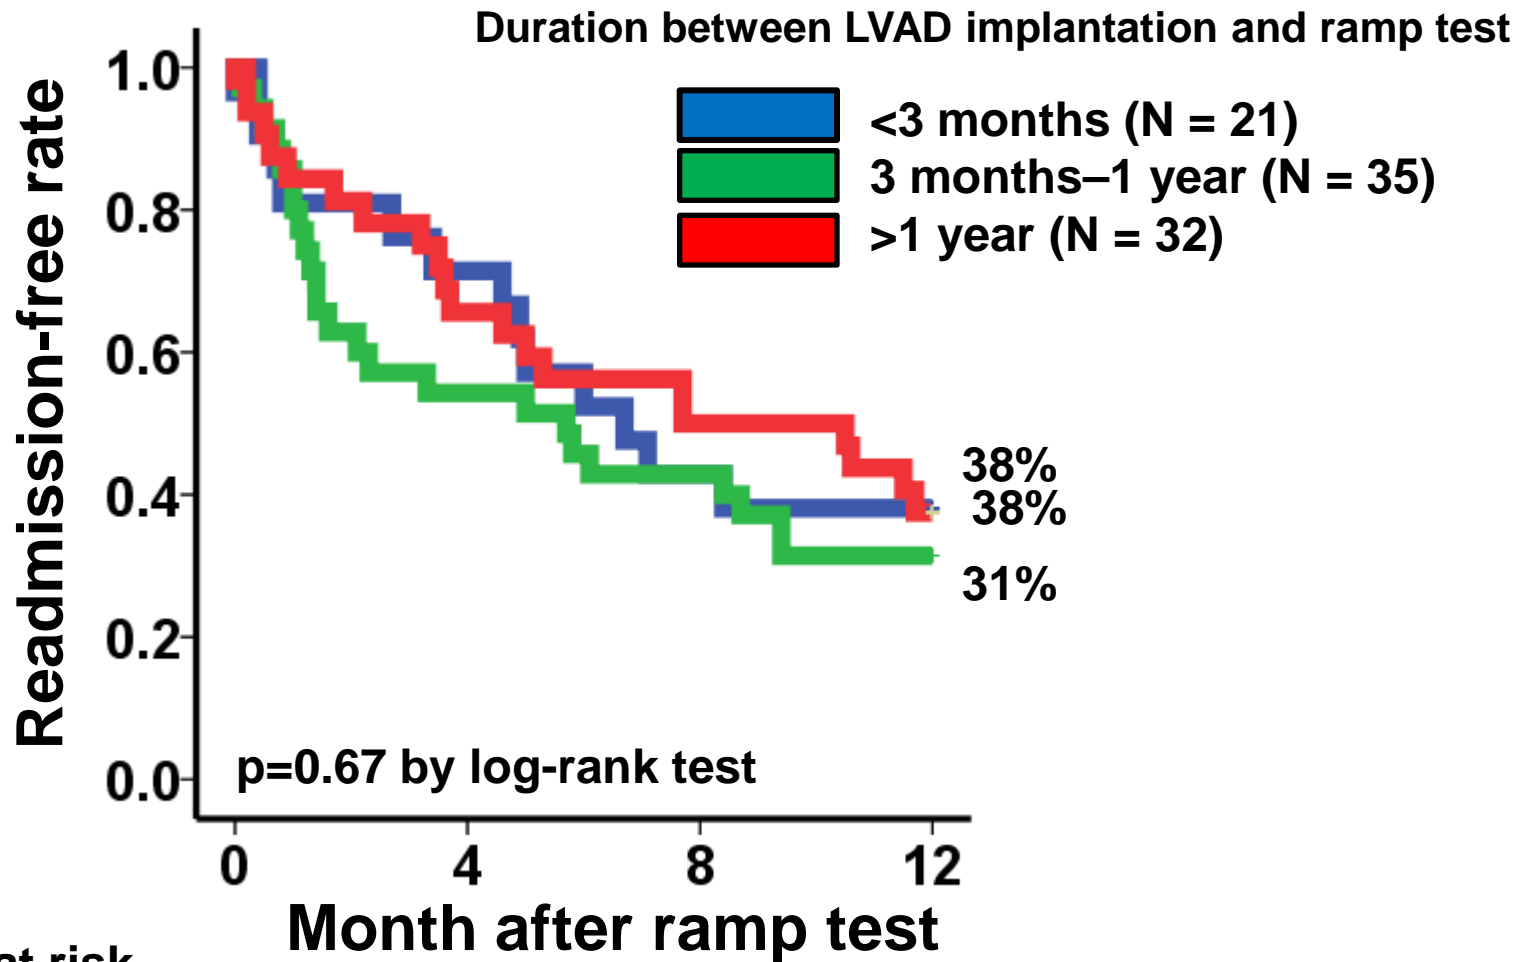

|                  |    |    |    |    |
|------------------|----|----|----|----|
| <3 months:       | 21 | 9  | 8  | 7  |
| 3 months–1 year: | 35 | 20 | 15 | 10 |
| >1 year:         | 32 | 25 | 16 | 11 |

**Appendix Figure 1**

**Appendix Table 1. Echocardiographic and hemodynamic change in six patients whose hemodynamics worsened during ramp test**

|          | Baseline LVAD speed |         |    |    |     |      |      |        |         |        | Set LVAD speed |         |    |    |     |      |      |        |         |        |
|----------|---------------------|---------|----|----|-----|------|------|--------|---------|--------|----------------|---------|----|----|-----|------|------|--------|---------|--------|
|          | RPM                 | AV open | AI | MR | CVP | PCWP | CI   | CVP<12 | PCWP<18 | CI>2.2 | RPM            | AV open | AI | MR | CVP | PCWP | CI   | CVP<12 | PCWP<18 | CI>2.2 |
| <b>A</b> | 2900                | 0       | 1  | 0  | 10  | 17   | 3.00 | 1      | 1       | 1      | 2900           | 0       | 0  | 0  | 11  | 21   | 3.00 | 1      | 0       | 1      |
| <b>B</b> | 2800                | 0       | 2  | 1  | 10  | 17   | 2.88 | 1      | 1       | 1      | 2800           | 0       | 1  | 1  | 10  | 18   | 3.14 | 1      | 0       | 1      |
| <b>C</b> | 8800                | 0       | 0  | 0  | 2   | 2    | 2.44 | 1      | 1       | 1      | 8800           | 0       | 0  | 0  | 1   | 1    | 2.11 | 1      | 1       | 0      |
| <b>D</b> | 9600                | 0       | 2  | 0  | 10  | 10   | 6.07 | 1      | 1       | 1      | 9600           | 0       | 1  | 0  | 13  | 12   | 5.94 | 0      | 1       | 1      |
| <b>E</b> | 9400                | 0       | 4  | 0  | 10  | 13   | 3.00 | 1      | 1       | 1      | 9200           | 0       | 2  | 0  | 13  | 16   | 2.82 | 0      | 1       | 1      |
| <b>F</b> | 9400                | 0       | 4  | 0  | 3   | 3    | 2.21 | 1      | 1       | 1      | 9000           | 0       | 2  | 0  | 4   | 3    | 1.90 | 1      | 1       | 0      |

LVAD, left ventricular assist device; RPM, rotation per minute; AV, aortic valve; AI, aortic insufficiency; MR, mitral valve regurgitation; CVP, central venous pressure; PCWP, pulmonary capillary wedge pressure; CI, cardiac index.

LVAD speeds remained unchanged in four patients (A-D), but they failed to achieve one hemodynamic goal at set LVAD speed.

LVAD speeds were decreased in two patients (E and F) to improve the degree of aortic insufficiency, which reduced from grade 4 (moderate) to grade 2 (mild). However, both patients failed to achieve one hemodynamic goal at set LVAD speed.

**Appendix Table 2. Changes in medications during one month following ramp test**

|                                           | <b>Optimized group<br/>(N = 54)</b> | <b>Non-optimized group<br/>(N = 34)</b> | <b>p value</b> |
|-------------------------------------------|-------------------------------------|-----------------------------------------|----------------|
| <b><i>Diuretics dose</i></b>              |                                     |                                         | 0.21           |
| Increased                                 | 10 (19%)                            | 12 (35%)                                | -              |
| Unchanged                                 | 33 (61%)                            | 16 (47%)                                | -              |
| Decreased                                 | 11 (20%)                            | 6 (18%)                                 | -              |
| <b><i>Beta-blocker dose</i></b>           |                                     |                                         | 0.85           |
| Increased                                 | 9 (17%)                             | 6 (18%)                                 | -              |
| Unchanged                                 | 42 (78%)                            | 27 (79%)                                | -              |
| Decreased                                 | 3 (6%)                              | 1 (3%)                                  | -              |
| <b><i>ACEI/ARB dose</i></b>               |                                     |                                         | 0.27           |
| Increased                                 | 8 (15%)                             | 9 (26%)                                 | -              |
| Unchanged                                 | 42 (78%)                            | 21 (62%)                                | -              |
| Decreased                                 | 4 (7%)                              | 4 (12%)                                 | -              |
| <b><i>Aldosterone antagonist dose</i></b> |                                     |                                         | 0.19           |
| Increased                                 | 8 (15%)                             | 2 (6%)                                  | -              |
| Unchanged                                 | 41 (76%)                            | 31 (91%)                                | -              |
| Decreased                                 | 5 (9%)                              | 1 (3%)                                  | -              |

ACEI, angiotensin-converting enzyme inhibitor; ARB, angiotensin receptor blocker.

**Appendix Table 3. Comparison in baseline characteristics between optimization-achieving group and still non-optimized group among baseline non-optimized group (N = 44)**

|                              | <b>Optimization-achieving group (N = 16)</b> | <b>Still non-optimized group (N = 28)</b> | <b>p value</b>           |
|------------------------------|----------------------------------------------|-------------------------------------------|--------------------------|
| Age, years                   | 60 (53, 66)                                  | 62 (53, 72)                               | 0.52                     |
| Gender, male                 | 10 (63%)                                     | 17 (61%)                                  | 0.58                     |
| Race, Caucasian              | 10 (63%)                                     | 16 (57%)                                  | 0.39                     |
| Body mass index              | 31.1 (22.9, 33.9)                            | 27.6 (22.7, 32.1)                         | 0.59                     |
| Pre-ramp LVAD duration, days | 328 (85, 921)                                | 370 (120, 947)                            | 0.71                     |
| Non-ischemic etiology        | 6 (38%)                                      | 18 (64%)                                  | 0.080                    |
| <b>Destination therapy</b>   | <b>8 (50%)</b>                               | <b>24 (86%)</b>                           | <b>0.011*</b>            |
| HeartMate II device          | 10 (63%)                                     | 21 (75%)                                  | 0.38                     |
| <b>CVP, mmHg</b>             | <b>10 (6, 13)</b>                            | <b>14 (9, 16)</b>                         | <b>0.025<sup>†</sup></b> |
| PCWP, mmHg                   | 16.9 ± 4.2                                   | 17.3 ± 5.6                                | 0.81                     |
| CI, L/min/m <sup>2</sup>     | 2.43 (2.10, 2.57)                            | 2.21 (2.01, 2.88)                         | 0.63                     |
| PAPi                         | 1.9 (1.6, 2.7)                               | 1.3 (1.0, 2.2)                            | 0.19                     |
| Change in LVAD speed         |                                              |                                           |                          |
| Decreased                    | 1 (6%)                                       | 4 (14%)                                   | 0.42                     |
| Unchanged                    | 2 (13%)                                      | 9 (32%)                                   | 0.15                     |
| Increased                    | 13 (81%)                                     | 15 (53%)                                  | 0.063                    |

LVAD, left ventricular assist device; CVP, central venous pressure; PCWP, pulmonary capillary wedge pressure; CI, cardiac index; PAPi, pulmonary artery pulsatility index. \*p <0.05 by Fischer's exact test. <sup>†</sup>p <0.05 by unpaired t-test.

**Appendix Table 4. All-cause readmission rate in the sub-groups stratified by the changes in hemodynamics during ramp test**

|                                                      | Event number | Observational duration (day) | All-cause readmission rate (events/year) | IRR (95% CI)     | p value |
|------------------------------------------------------|--------------|------------------------------|------------------------------------------|------------------|---------|
| <i>Optimized at baseline LVAD speed (N = 44)</i>     |              |                              |                                          |                  |         |
| Optimized at set LVAD speed (N = 38)                 | 36           | 13634                        | 0.96                                     | 0.38 (0.13–1.13) | 0.079   |
| Non-optimized at set LVAD speed (N = 6)              | 12           | 1890                         | 2.32                                     |                  |         |
| <i>Non-optimized at baseline LVAD speed (N = 44)</i> |              |                              |                                          |                  |         |
| Optimized at set LVAD speed (N = 16)                 | 22           | 4820                         | 1.67                                     | 0.64 (0.30–1.37) | 0.26    |
| Non-optimized at set LVAD speed (N = 28)             | 80           | 9860                         | 2.96                                     |                  |         |

LVAD, left ventricular assist device; IRR, incidence rate ratio; CI, confidence interval. Variables were compared by negative binomial regression analysis

**Appendix Table 5. Clinical parameters at three months following ramp test**

|                                             | <b>Optimized group (N = 54)</b> | <b>Non-optimized group (N = 34)</b> | <b>p value</b> |
|---------------------------------------------|---------------------------------|-------------------------------------|----------------|
| New York Heart Association functional class |                                 |                                     | 0.13           |
| Class I                                     | 24 (44%)                        | 12 (35%)                            | -              |
| Class II                                    | 29 (54%)                        | 18 (53%)                            | -              |
| Class III                                   | 1 (2%)                          | 4 (12%)                             | -              |
| Laboratory data                             |                                 |                                     |                |
| Hemoglobin, g/dL                            | 12.1 ± 1.3                      | 11.6 ± 1.5                          | 0.079          |
| Hematocrit, %                               | 36.6 (33.4, 39.1)               | 36.1 (33.4, 38.9)                   | 0.70           |
| eGFR, mL/min/1.73m <sup>2</sup>             | 56 (45, 68)                     | 45 (38, 61)                         | 0.056          |
| Serum total bilirubin, mg/dL                | 0.5 (0.4, 0.7)                  | 0.8 (0.6, 0.9)                      | 0.025*         |

eGFR, estimated glomerular filtration ratio.

\*p <0.05 by Mann-Whitney U test.



**Appendix Table 6. All-cause readmission rates before and after ramp test**

|                              | <b>Pre-ramp period</b> | <b>Post-ramp period</b> |
|------------------------------|------------------------|-------------------------|
| Entire cohort (N = 88)       | 1.02 events/year       | 1.81 events/year        |
| Optimized group (N = 54)     | 1.13 events/year       | 1.15 events/year        |
| Non-optimized group (N = 34) | 0.97 events/year       | 2.86 events/year        |
